# Supplementary material for: VEGF-loaded graphene oxide as theranostics for multi-modality imaging-monitored targeting therapeutic angiogenesis of ischemic muscle
Source: Royal Society of Chemistry journal article supplement (doi:10.1039/c3nr01573d), 2013-01-01
Supplement: c3nr01573d.pdf [file c3nr01573d.pdf]

## Supplementary Information

### VEGF-loaded Graphene Oxide as Theranostics for Multi-Modality Imaging-Monitored Targeting Therapeutic Angiogenesis of Ischemic Muscle

Zhongchan Sun<sup>1,2,§</sup>, Peng Huang<sup>2,3,§</sup>, Guang Tong<sup>4</sup>, Jing Lin<sup>1,3</sup>, Albert Jin<sup>5</sup>, Pengfei Rong<sup>2</sup>, Lei  
Zhu<sup>2,6</sup>, Liming Nie<sup>2</sup>, Gang Niu<sup>2,\*</sup>, Feng Cao<sup>1,\*</sup>, Xiaoyuan Chen<sup>2,\*</sup>

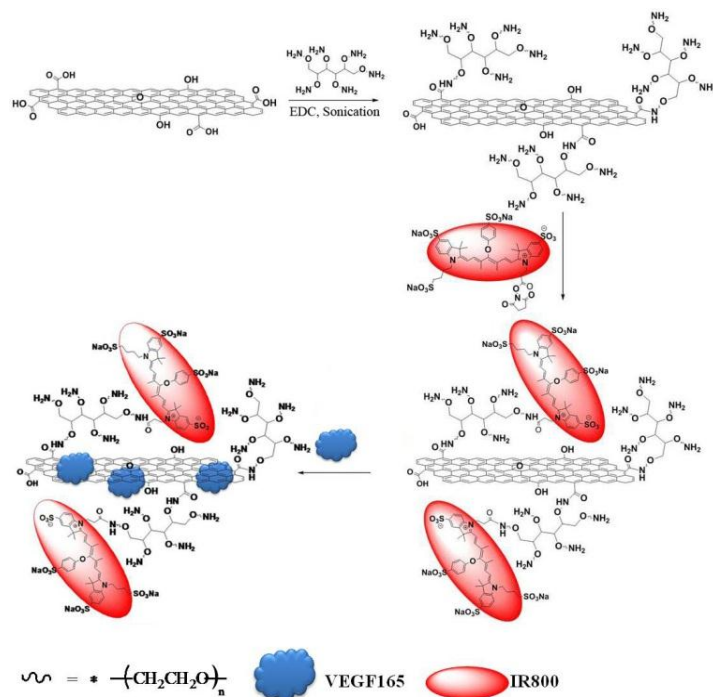

**Figure S1.** The synthetic route of VEGF-loaded IR800-conjugated graphene oxide (GO-IR800-VEGF).

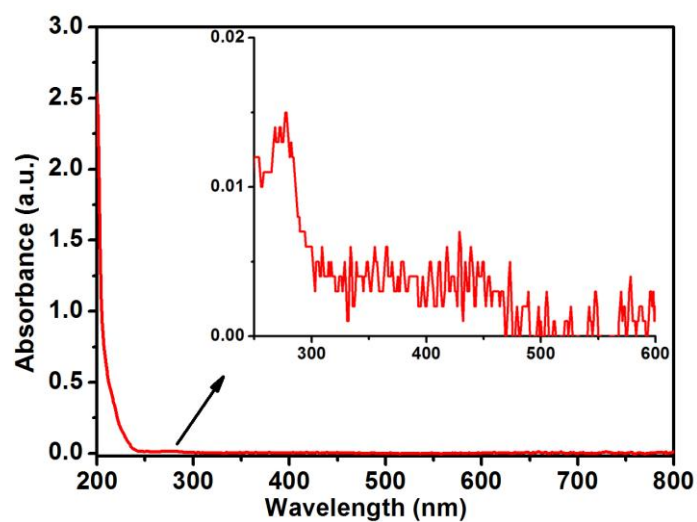

**Figure S2.** UV-vis absorbance spectrum of VEGF<sub>165</sub>.

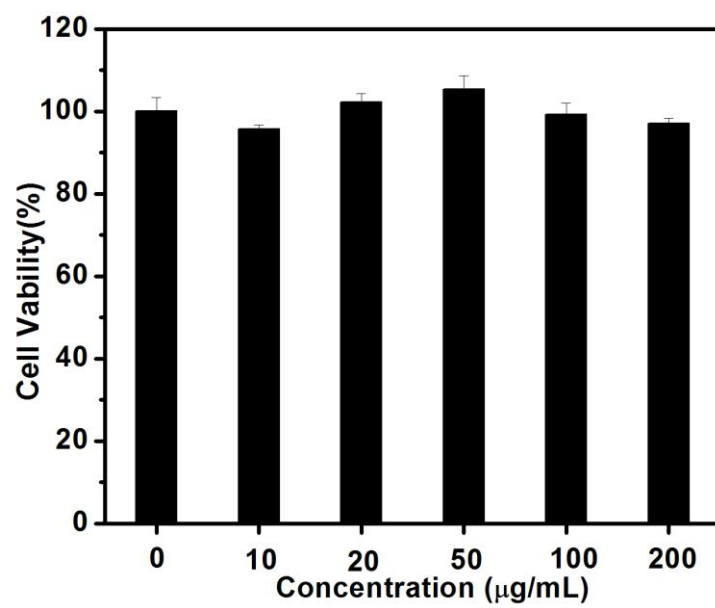

**Figure S3.** Cellular toxicity of GO-IR800-VEGF on MDA-MB-435 cells incubated with 0~200 µg/mL GO-IR800-VEGF for 24 h at 37 °C in the dark.

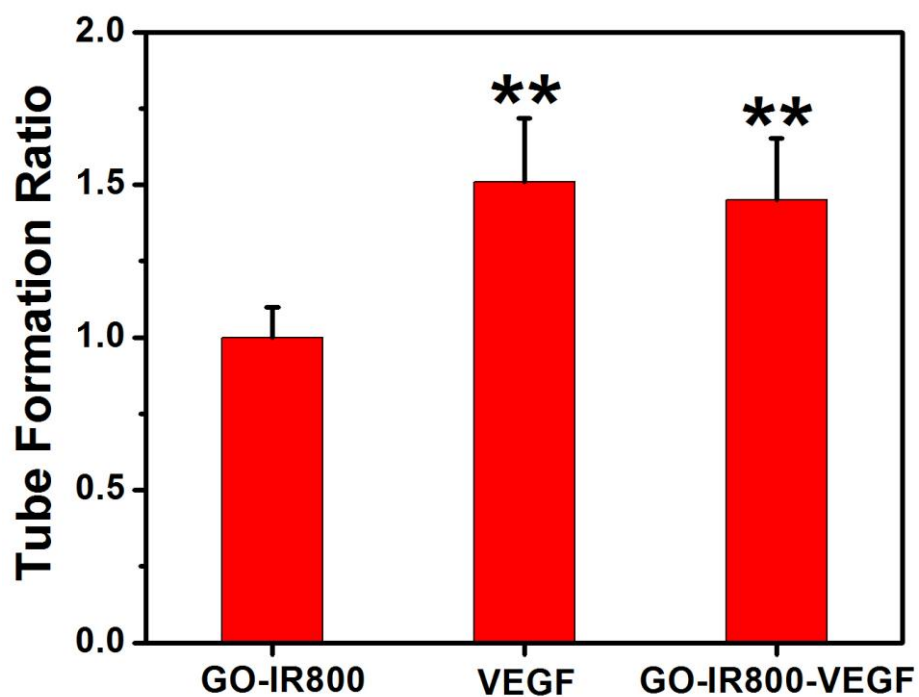

**Figure S4.** Total capillary tube length measurement. Tube formation ratio was the total capillary tube length of VEGF or VEGF-IR800-VEGF treated HUVEC cultured well divided by that of GO-IR800 treated well (n = 4/group). \*\*, P < 0.01.

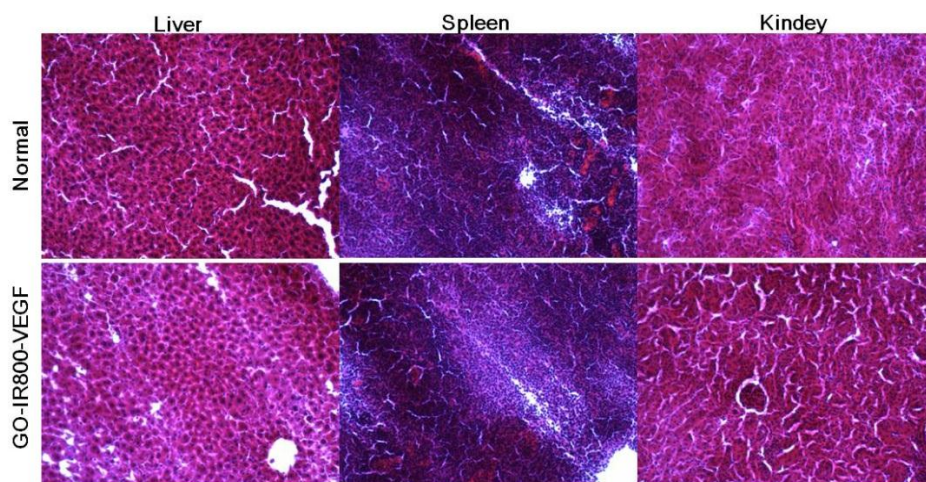

**Figure S5.** H&E stained images of major organs, harvested at 24 h time point from mice injected with/without GO-IR800-VEGF.

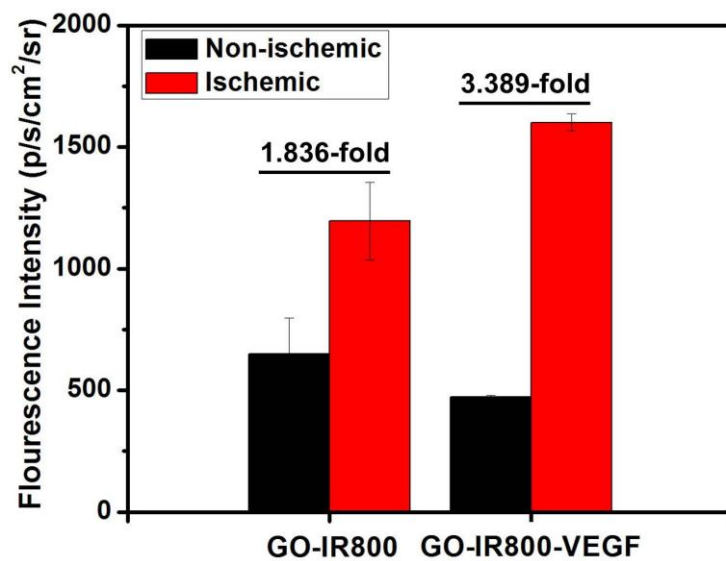

**Figure S6.** The fluorescence intensity of ischemic (left limb) and non-ischemic (right limb) tissues harvested at 24 h time point from post-injection mice (n = 3/group).
